# Supplementary material for: High CD21 expression inhibits internalization of anti-CD19 antibodies and cytotoxicity of an anti-CD19-drug conjugate
Source: PubMed Central journal article supplement (PMC2228374; doi:10.1111/j.1365-2141.2007.06883.x), 2007-11-07

Ingle *et al.* Supplemental Figure 1:  
Three other anti-CD19 antibodies behave  
similarly to B496

A: Raji (high CD21)

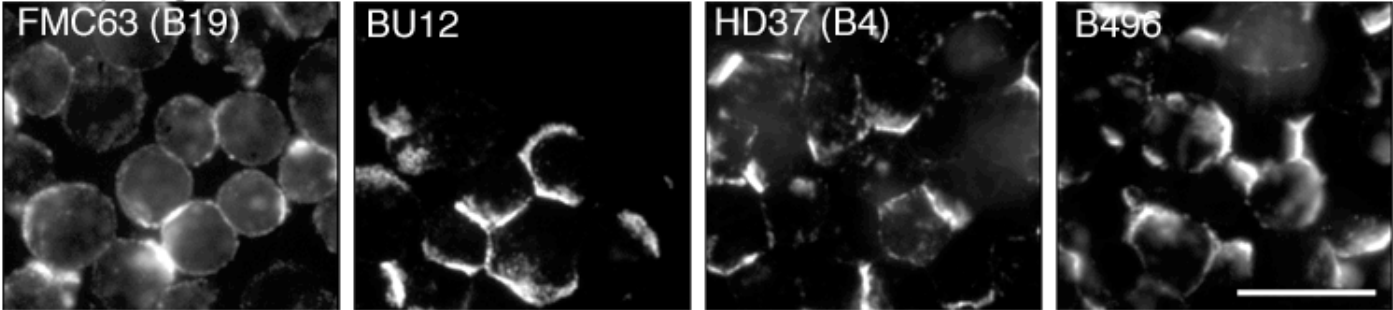

B: ARH77 (high CD21)

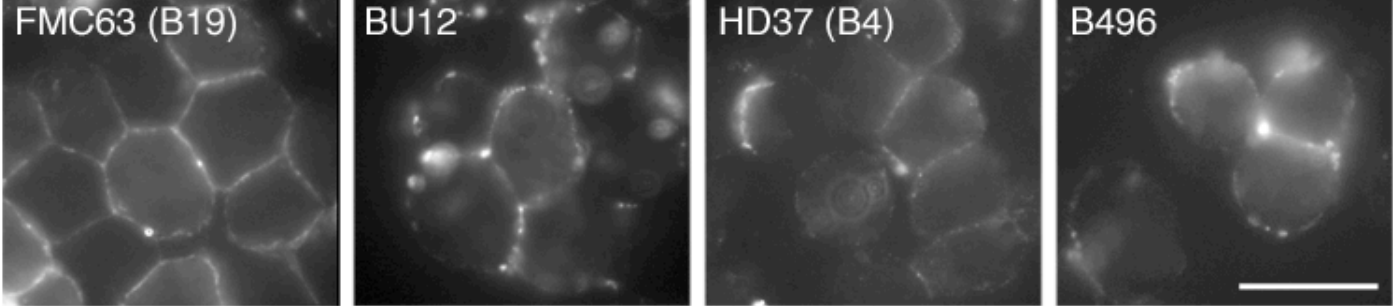

C: Ramos (no CD21)

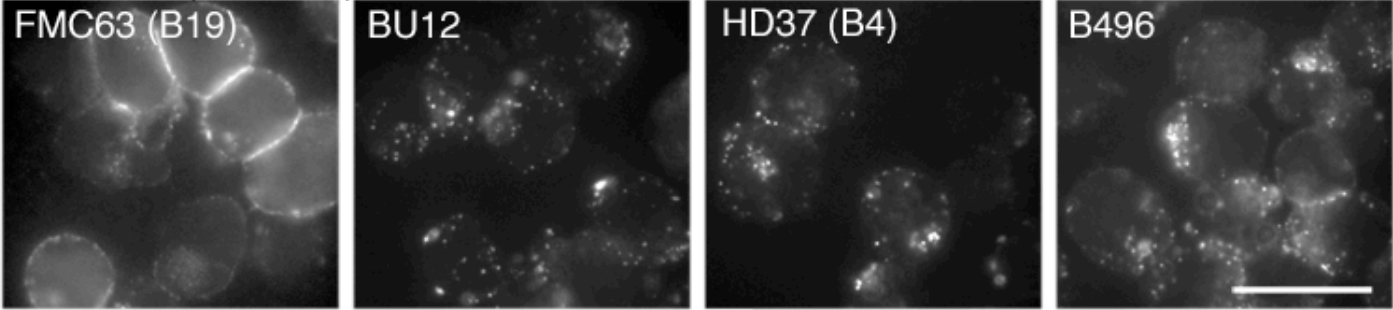

Ingle *et al.* Supplemental Figure 2:  
 CD21 complexes with CD19 in the Ramos-  
 CD21 clone 1 stable cell line

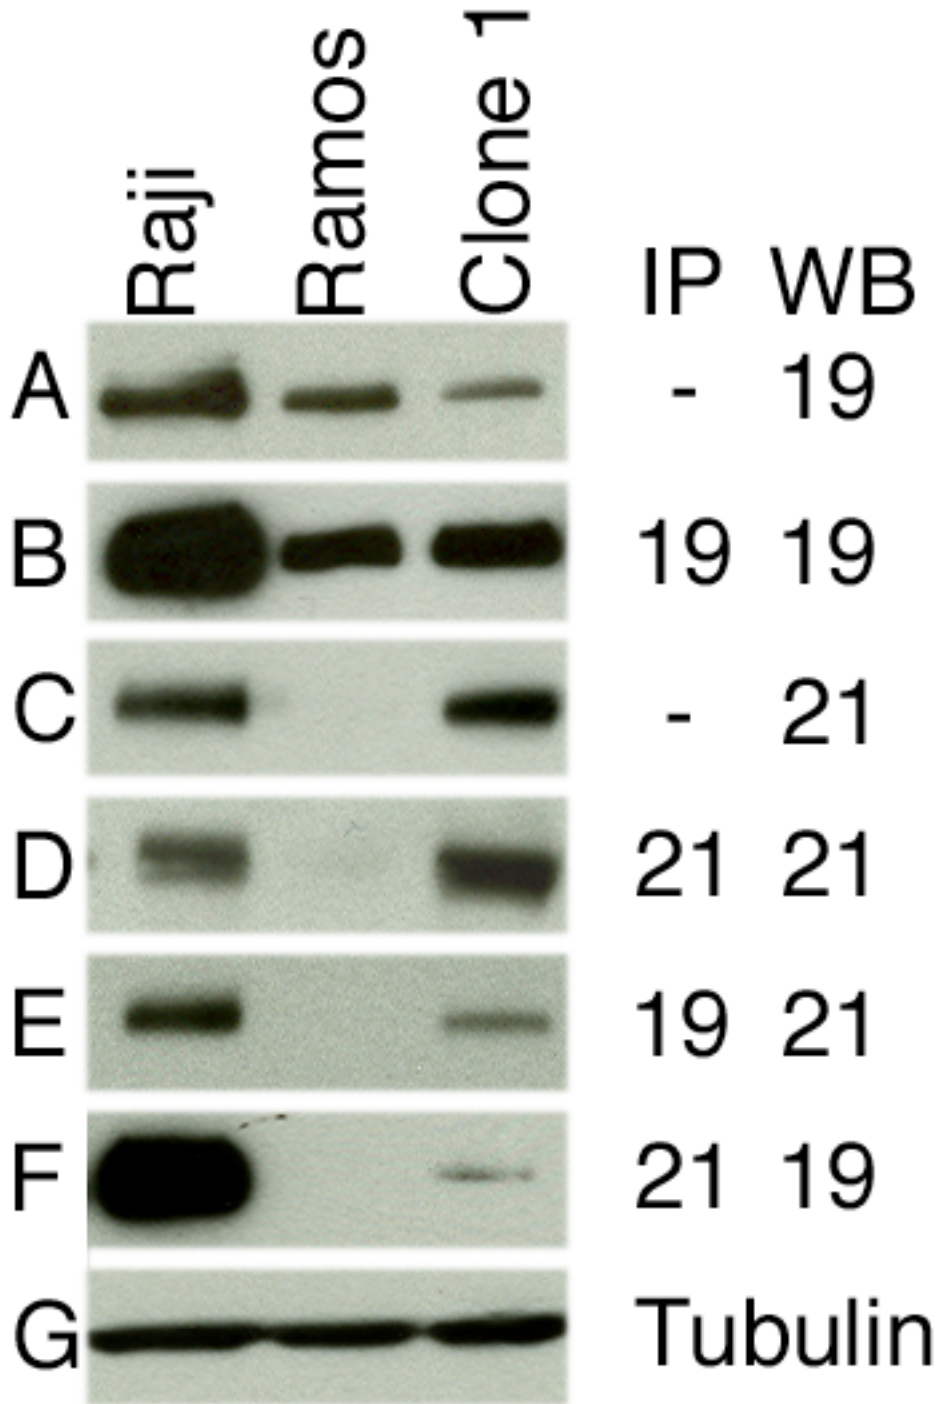

Ingle *et al.* Supplemental Figure 3:  
Anti-CD19 is delivered to lysosomes  
by 3 hours in all the internalizing cell  
lines

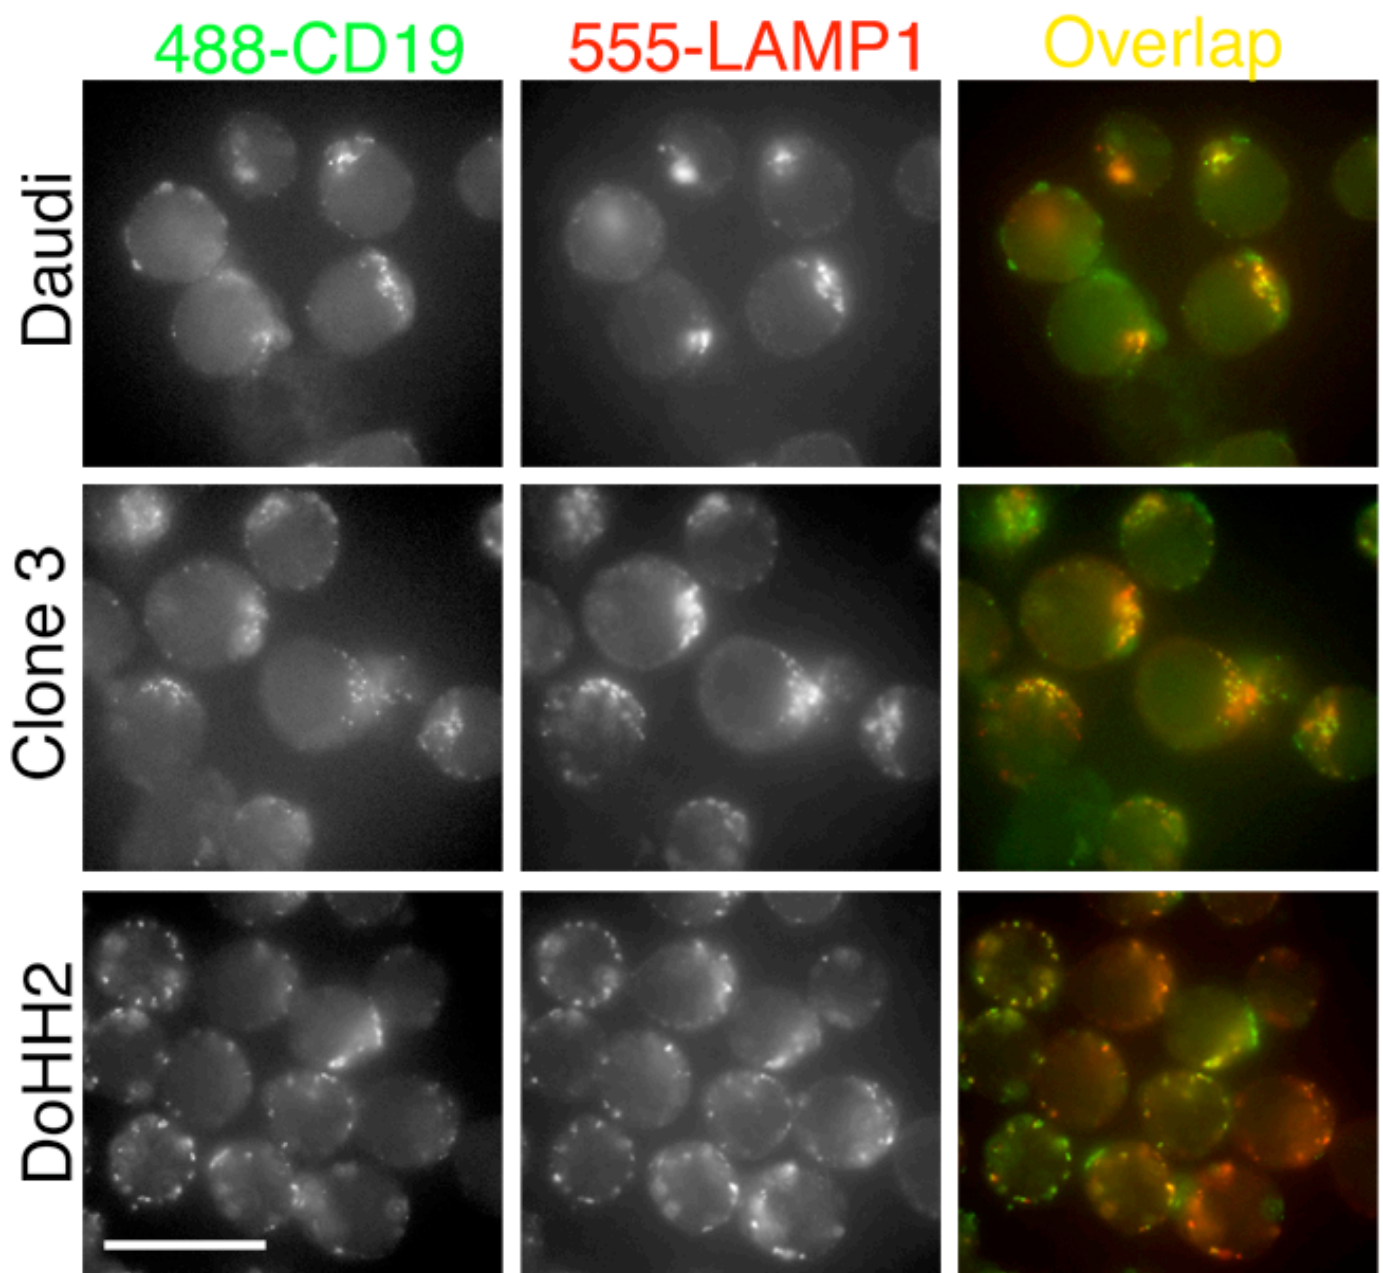

Ingle et al.  
Supplemental Figure 4:  
control cytotoxicity  
assays

A) Viability assay of naked anti-CD19 antibodies in ARH77 cells

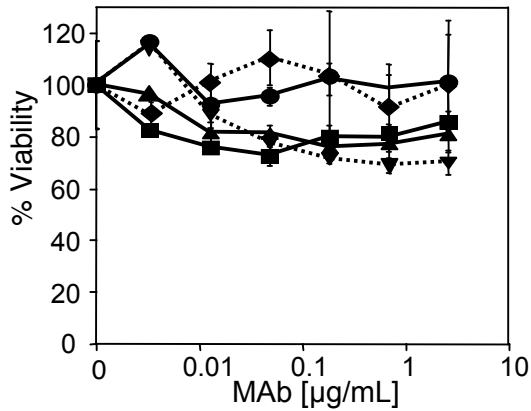

B) Apoptosis assay in ARH77 cells

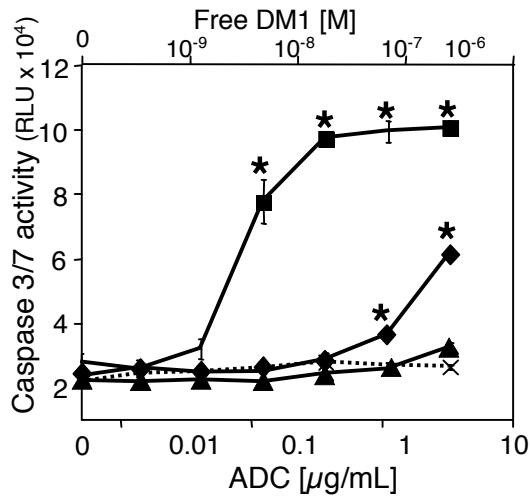

C) Anti-CD19-MCC-DM1 in Jurkat cells

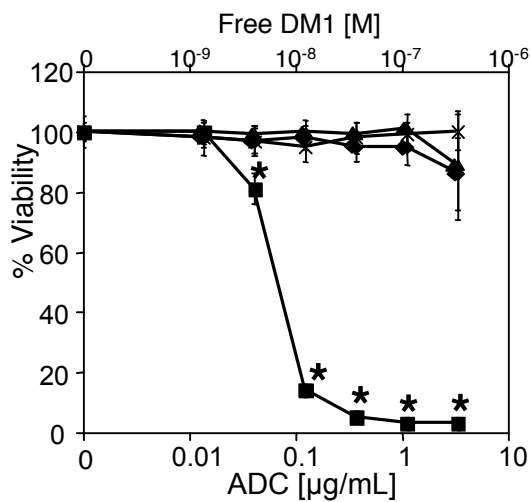

Ingle *et al.* Supplemental Figure 5:  
Dual CD19,21 immunofluorescence of lymphomas

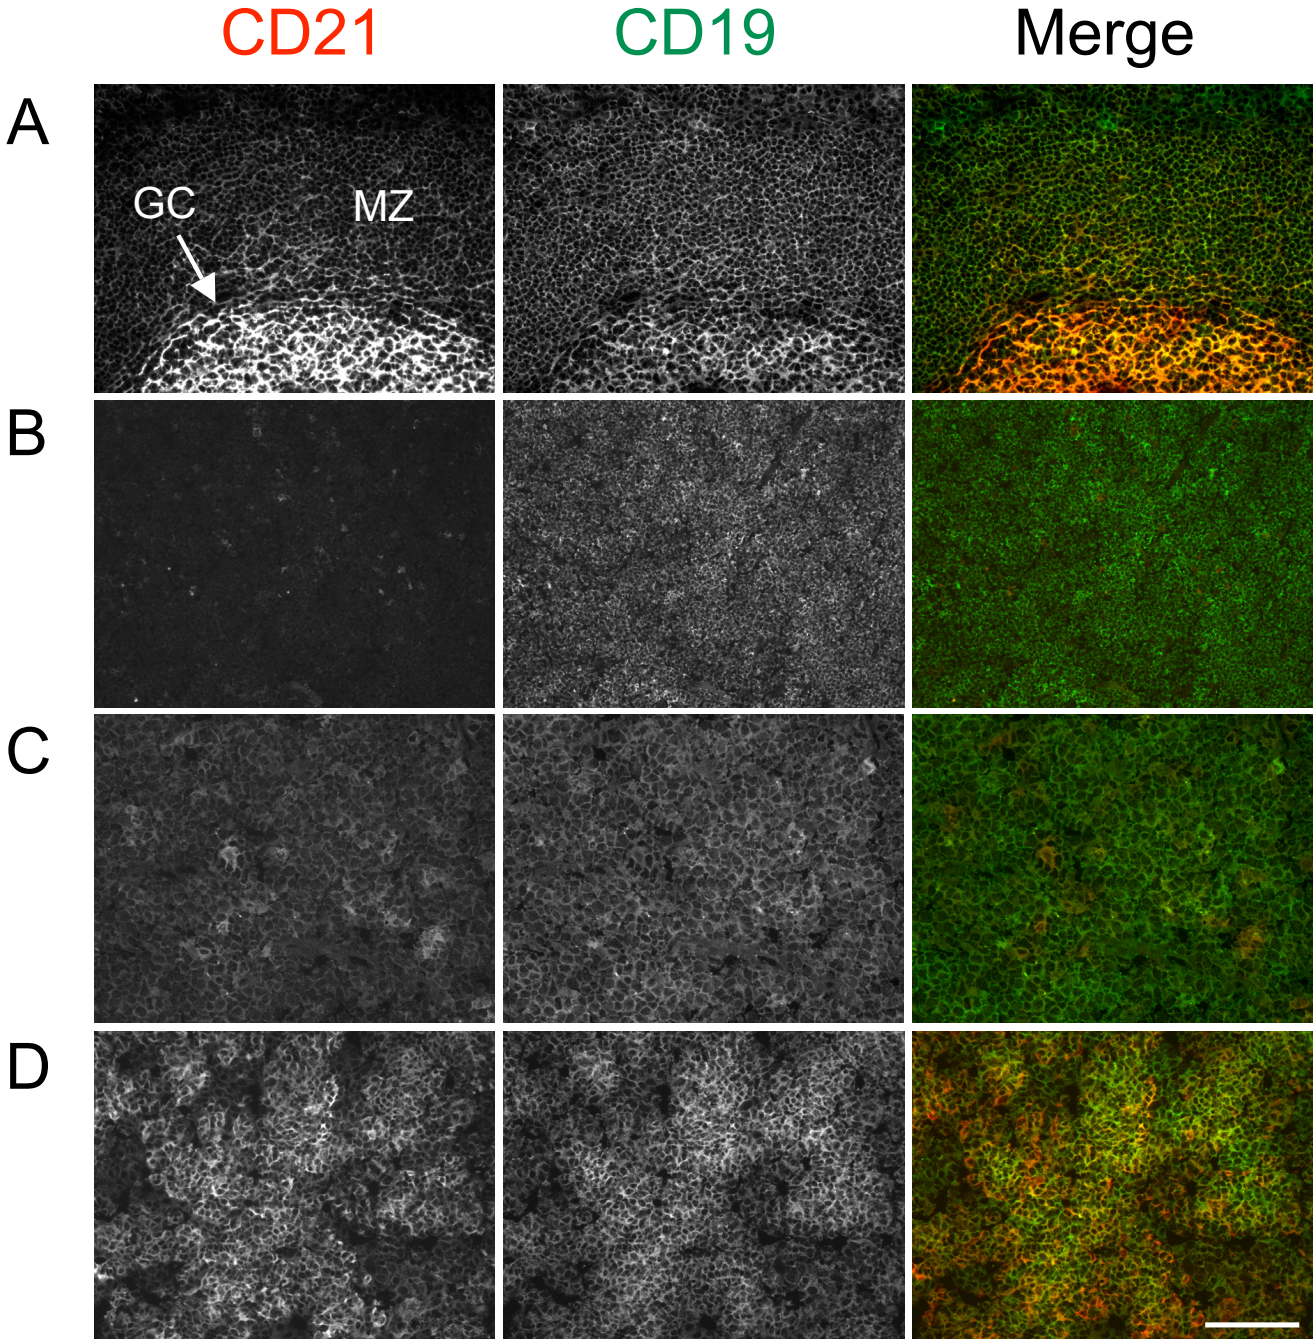

Supplement: bjh0140-0046-SD1.pdf [file bjh0140-0046-SD1.pdf]
